# Supplementary material
Source: PubMed Central journal article supplement (PMC7785668)

Figure S1

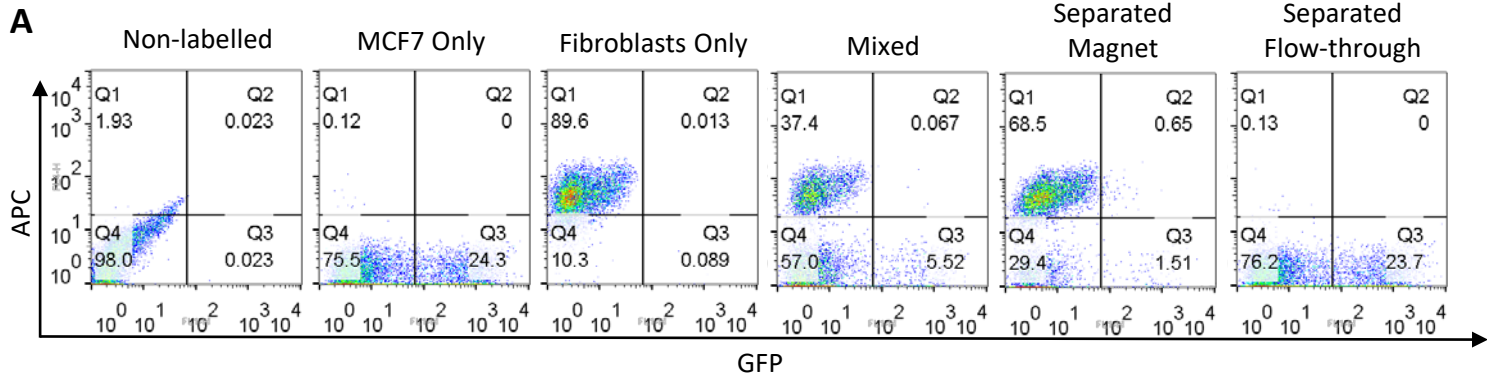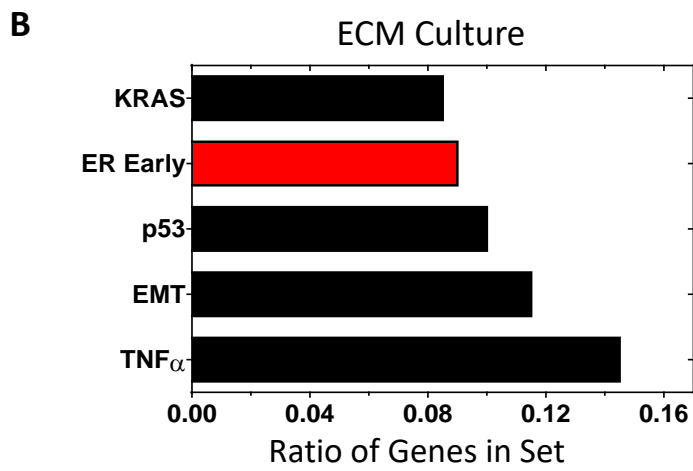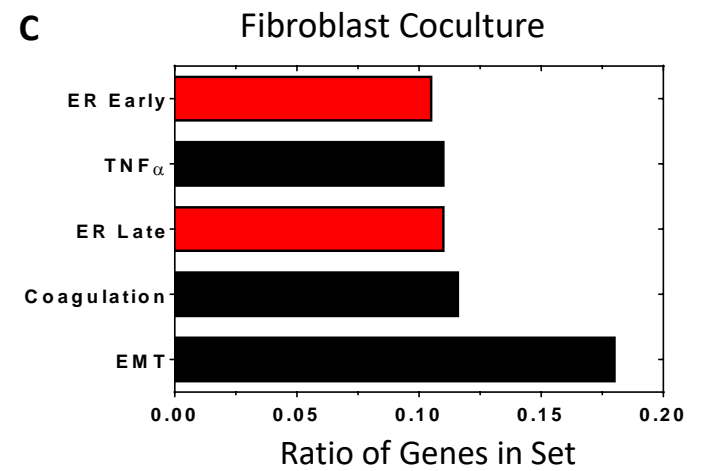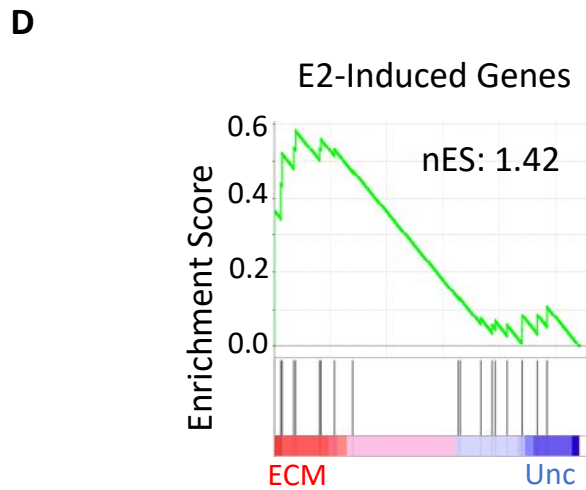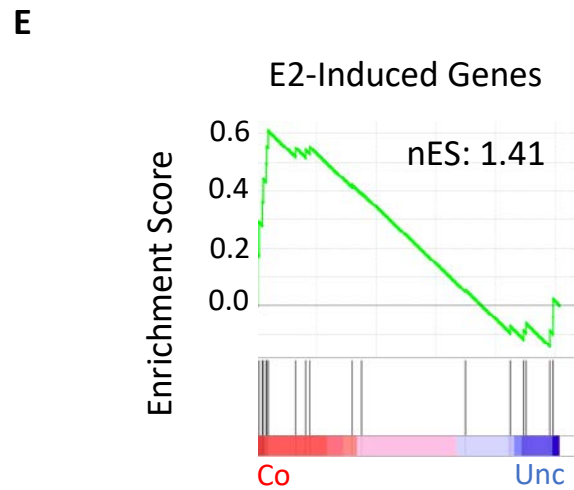

Figure S2

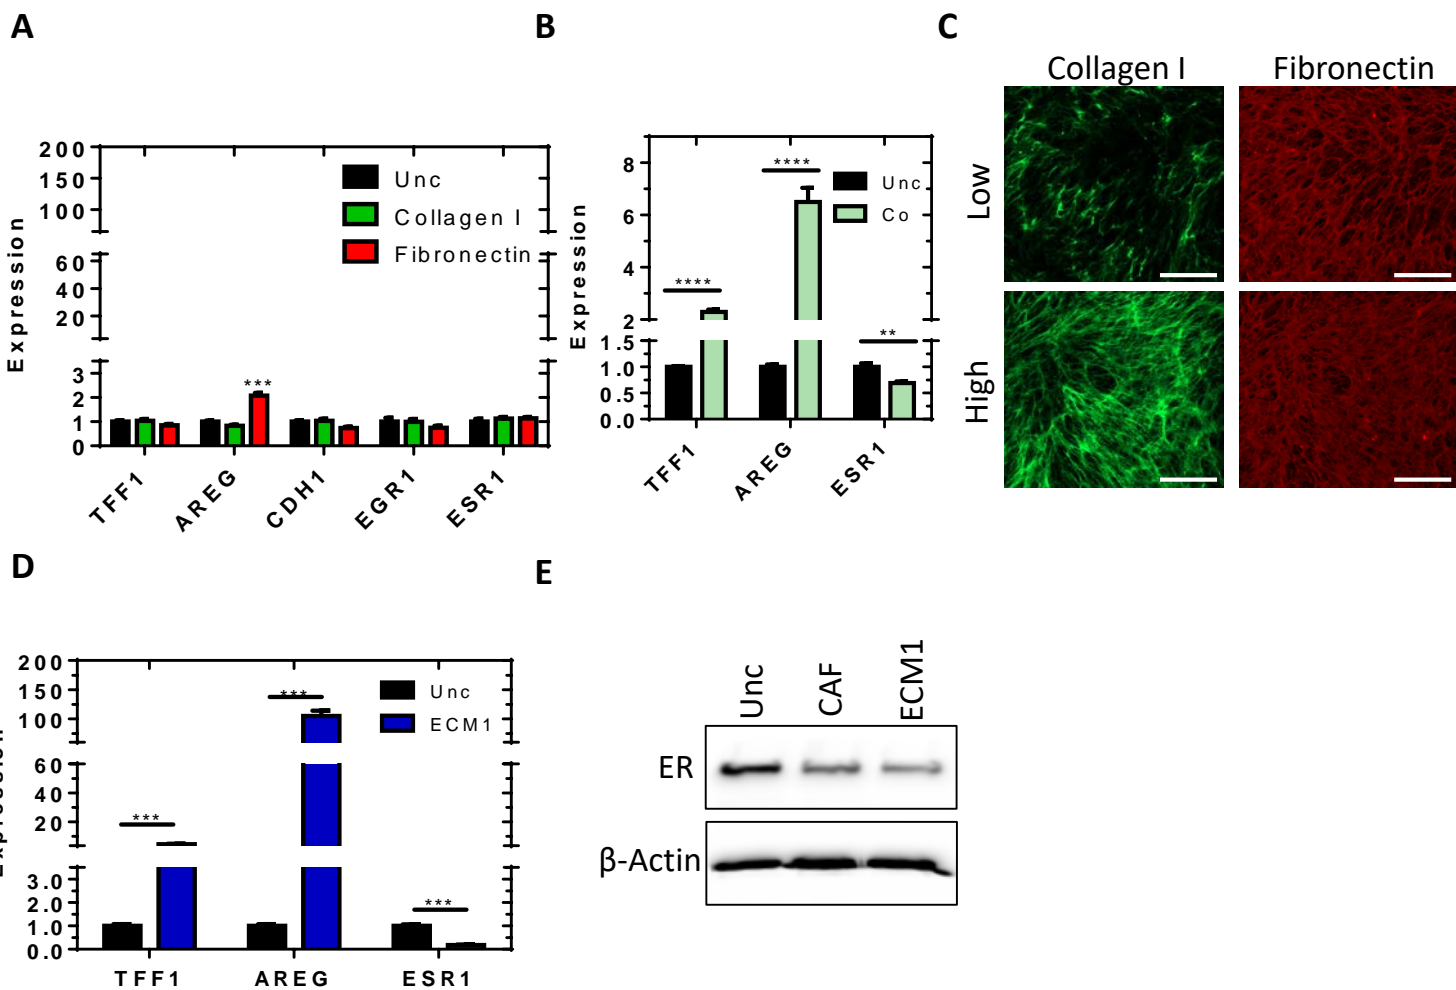

Figure S3

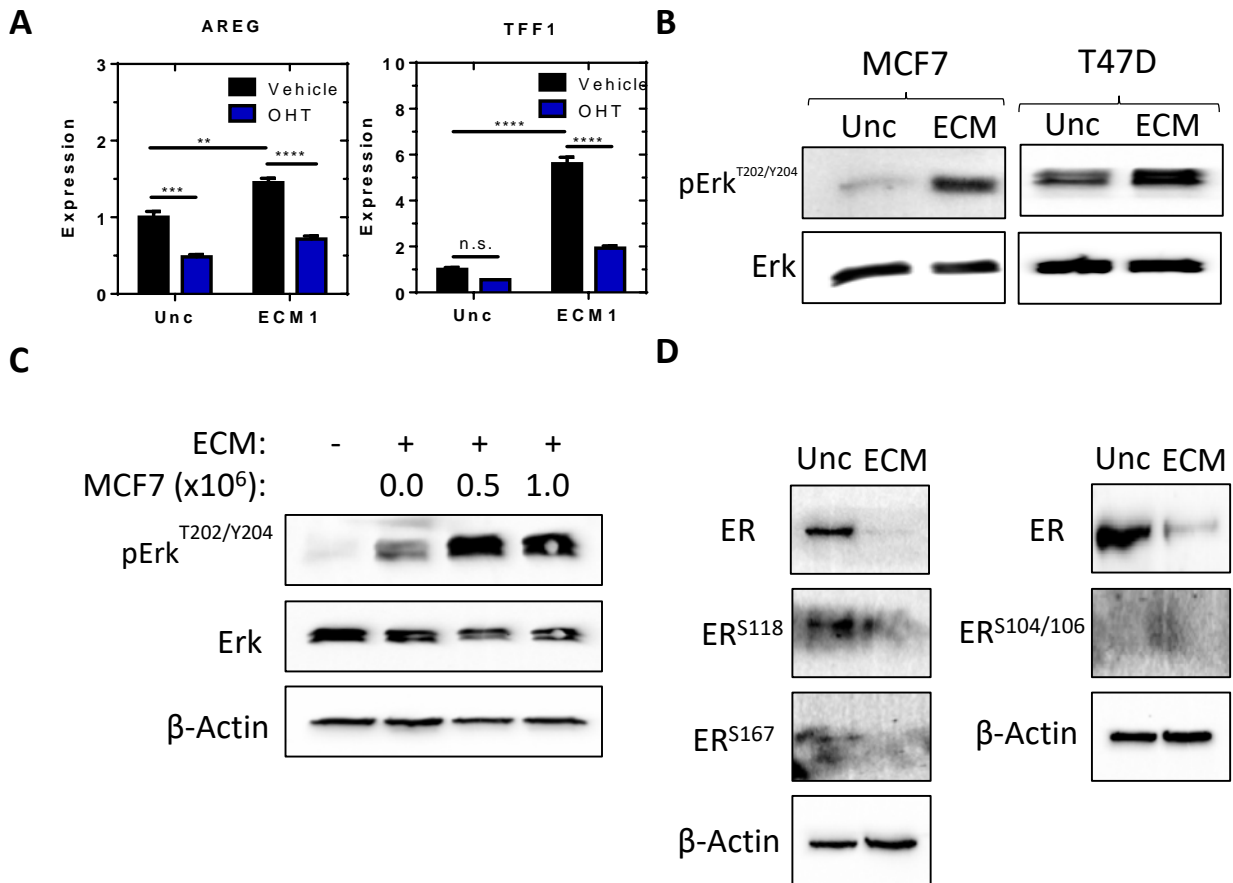

Figure S4

**A**

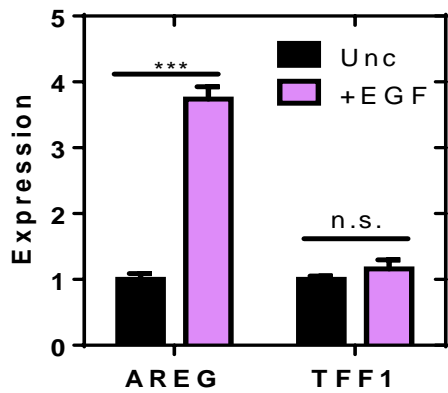

**B**

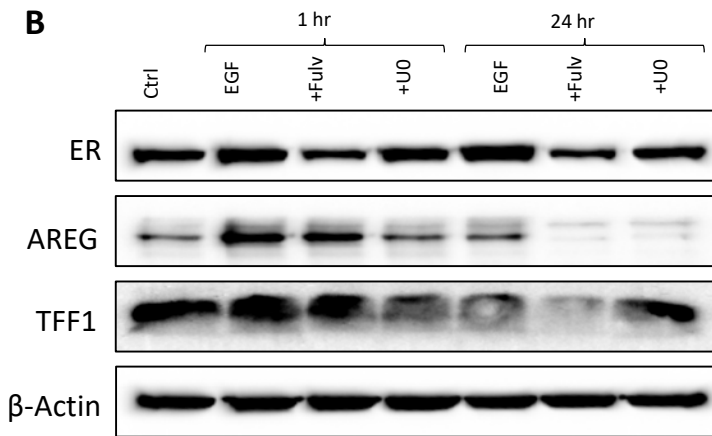

**C**

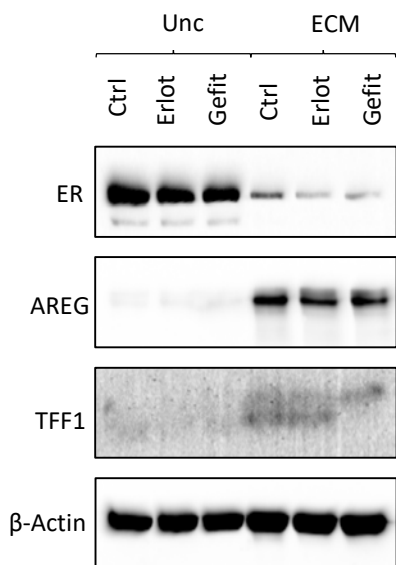

**D**

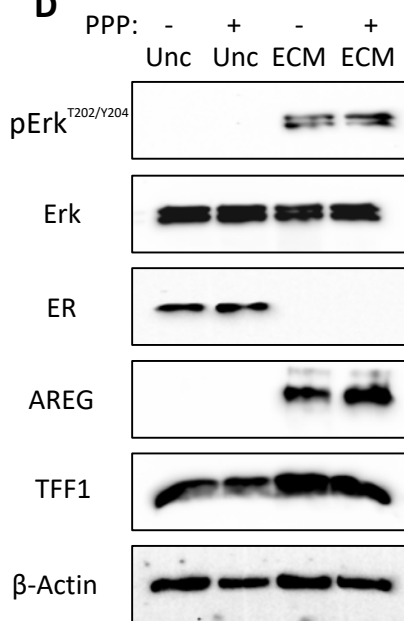

**E**

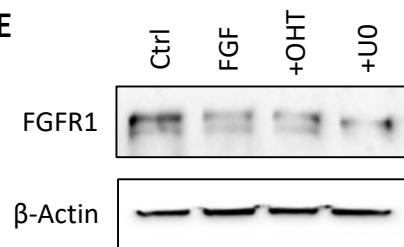

**G**

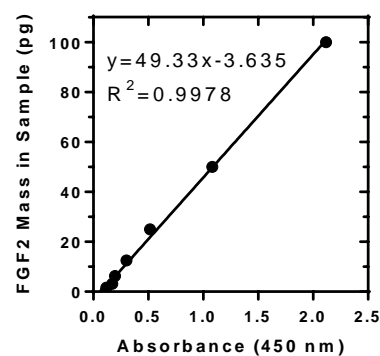

**F**

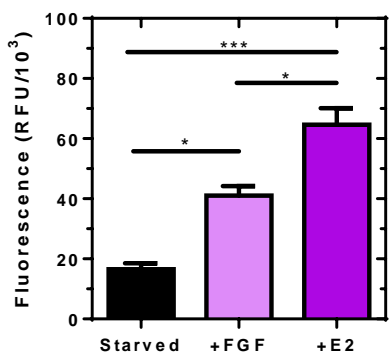

**H**

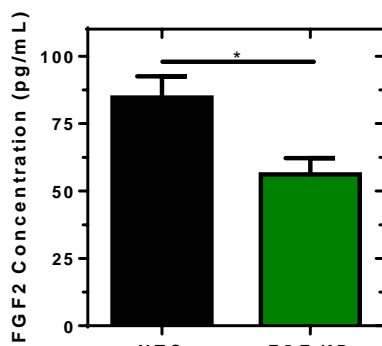

**I**

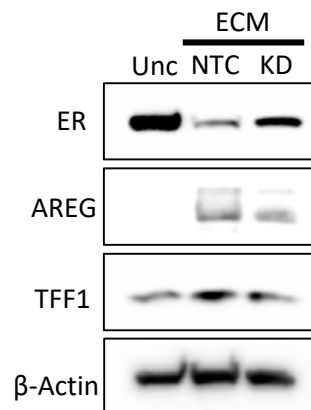

**J**

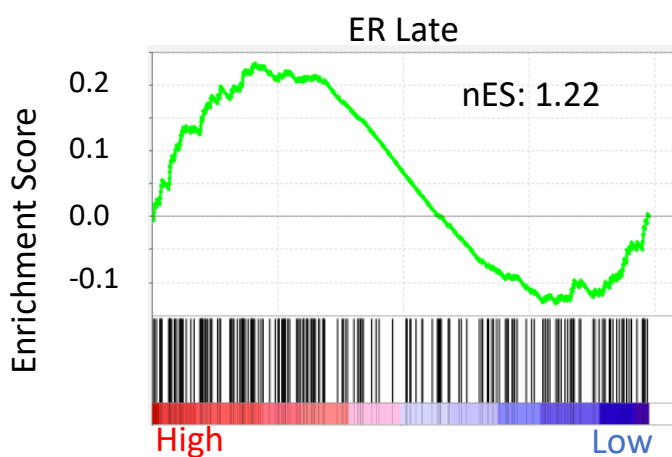

**K**

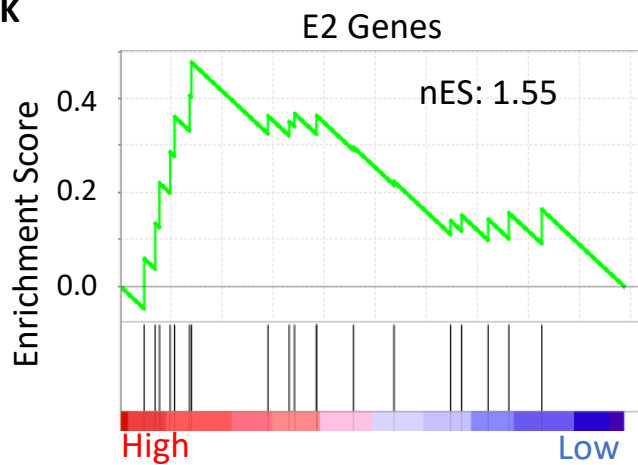

Figure S5

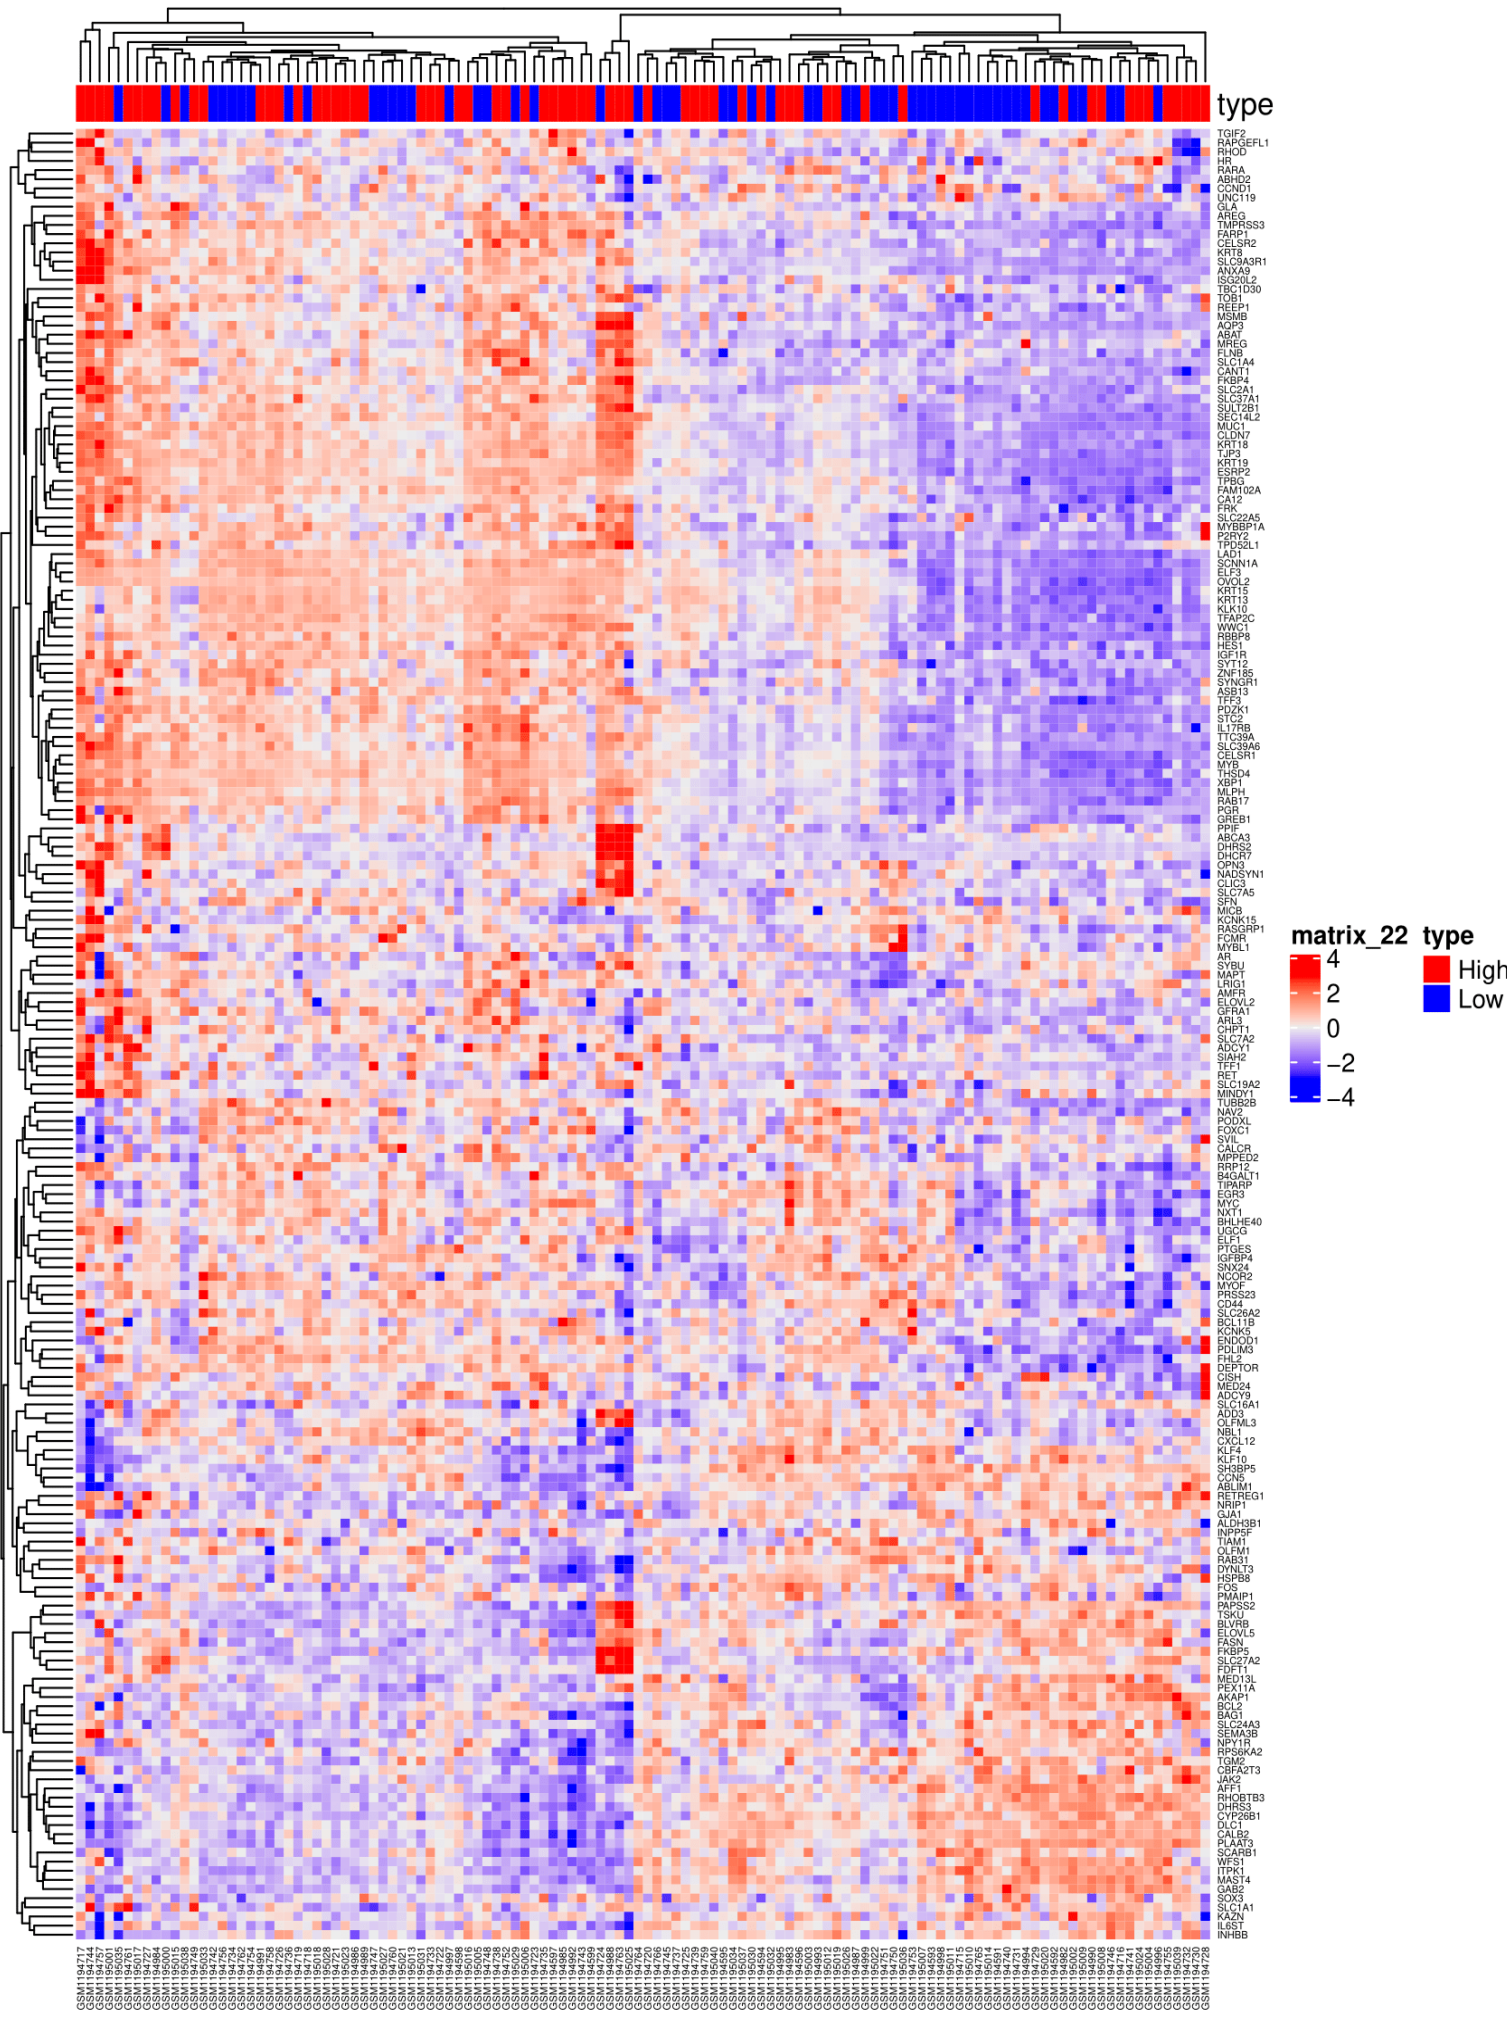

Figure S6

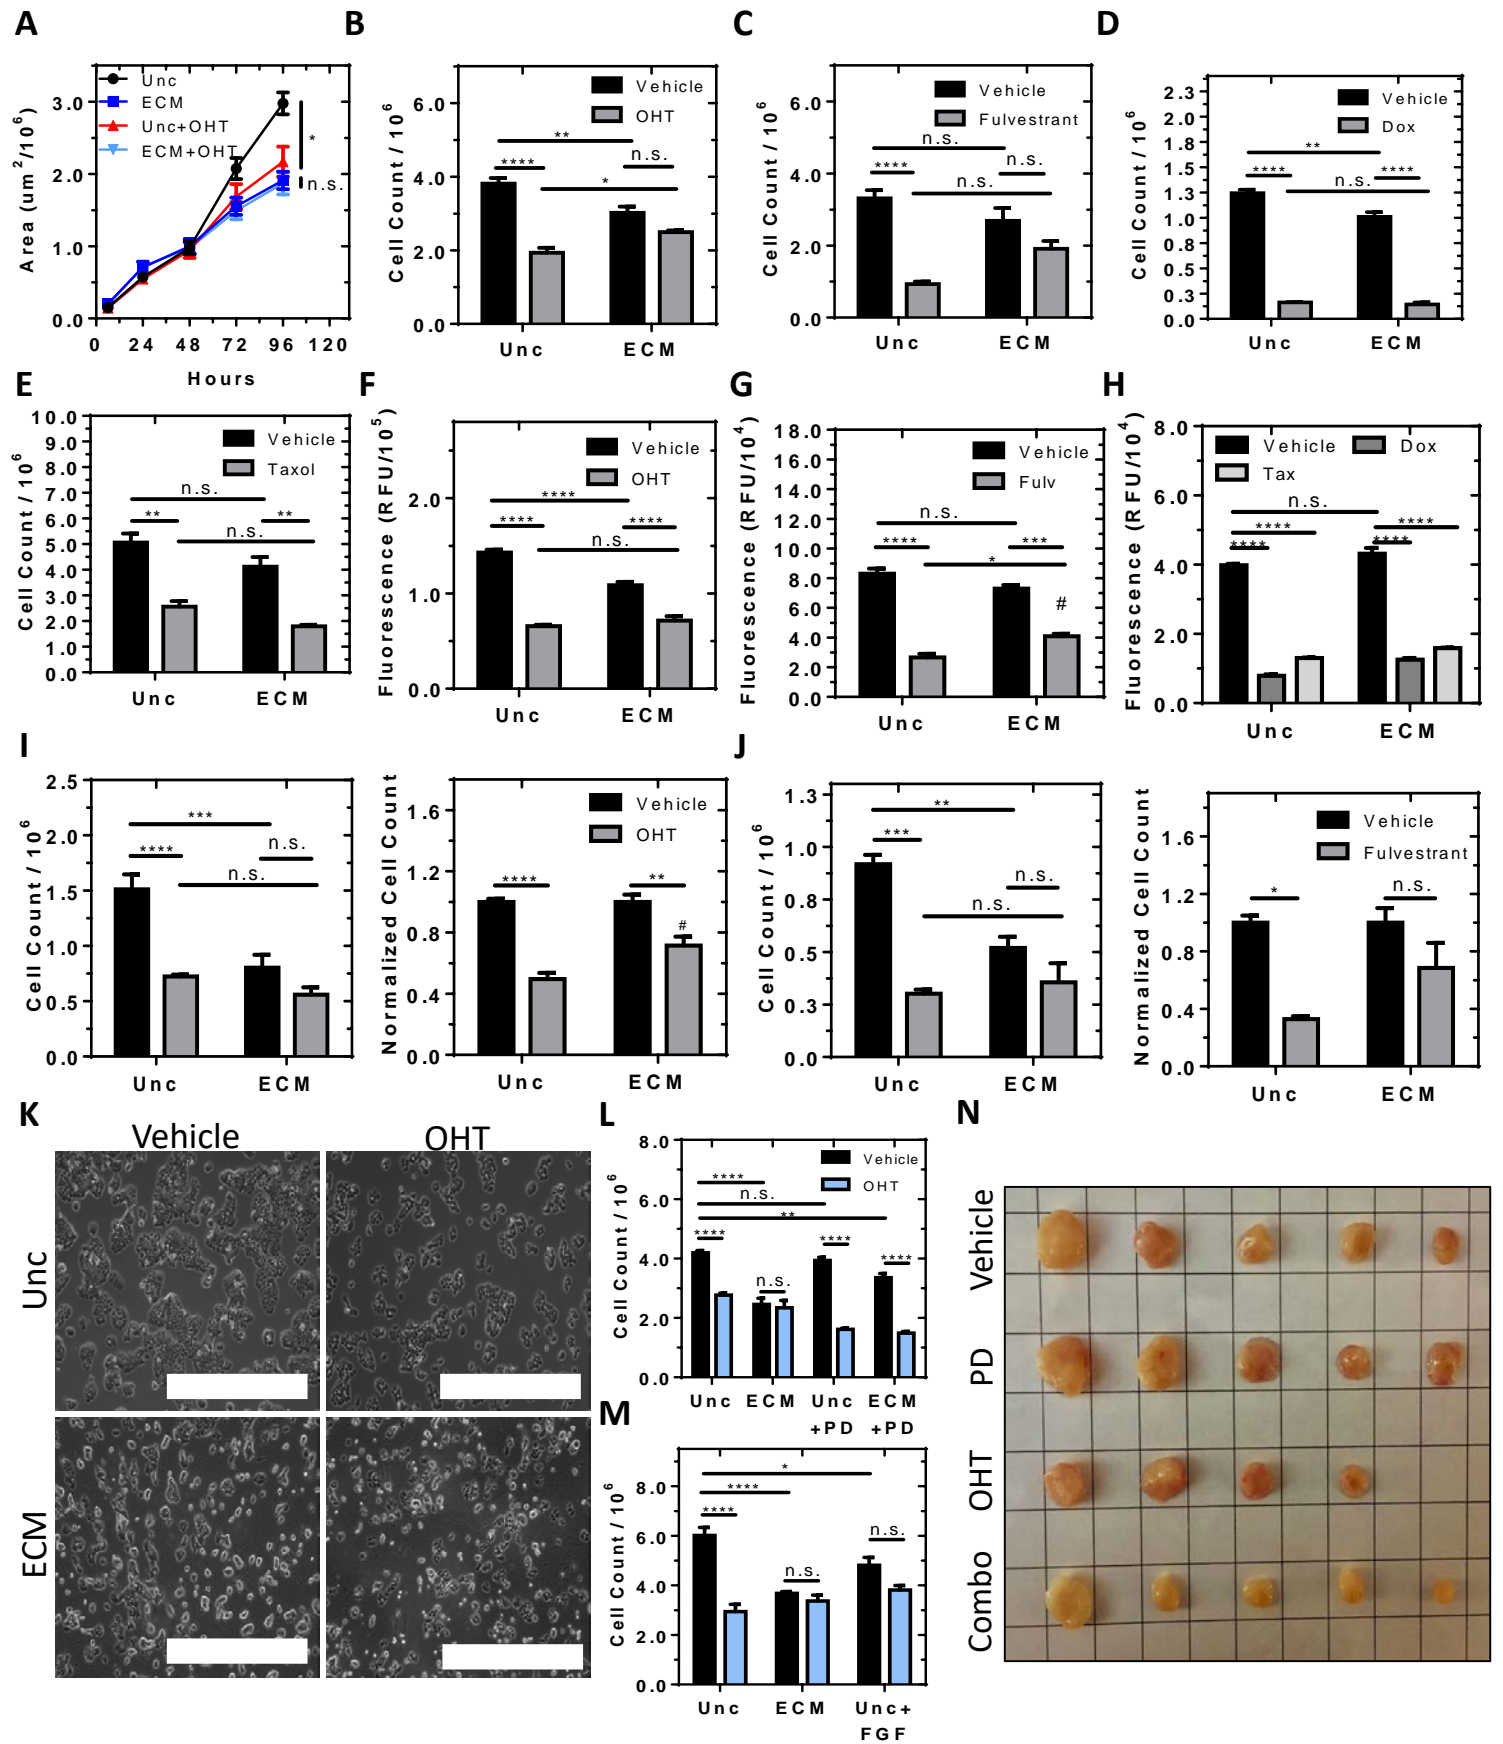

Figure S7

A

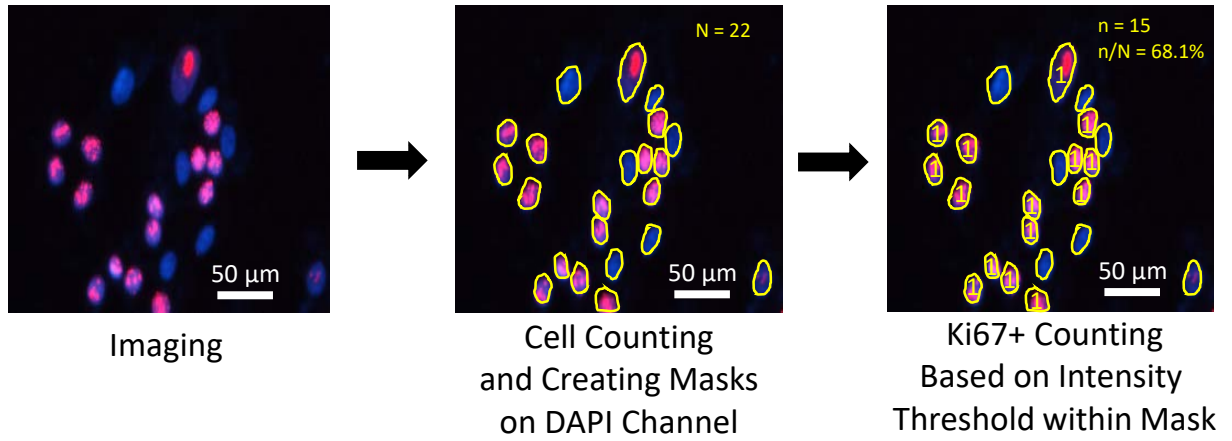

B

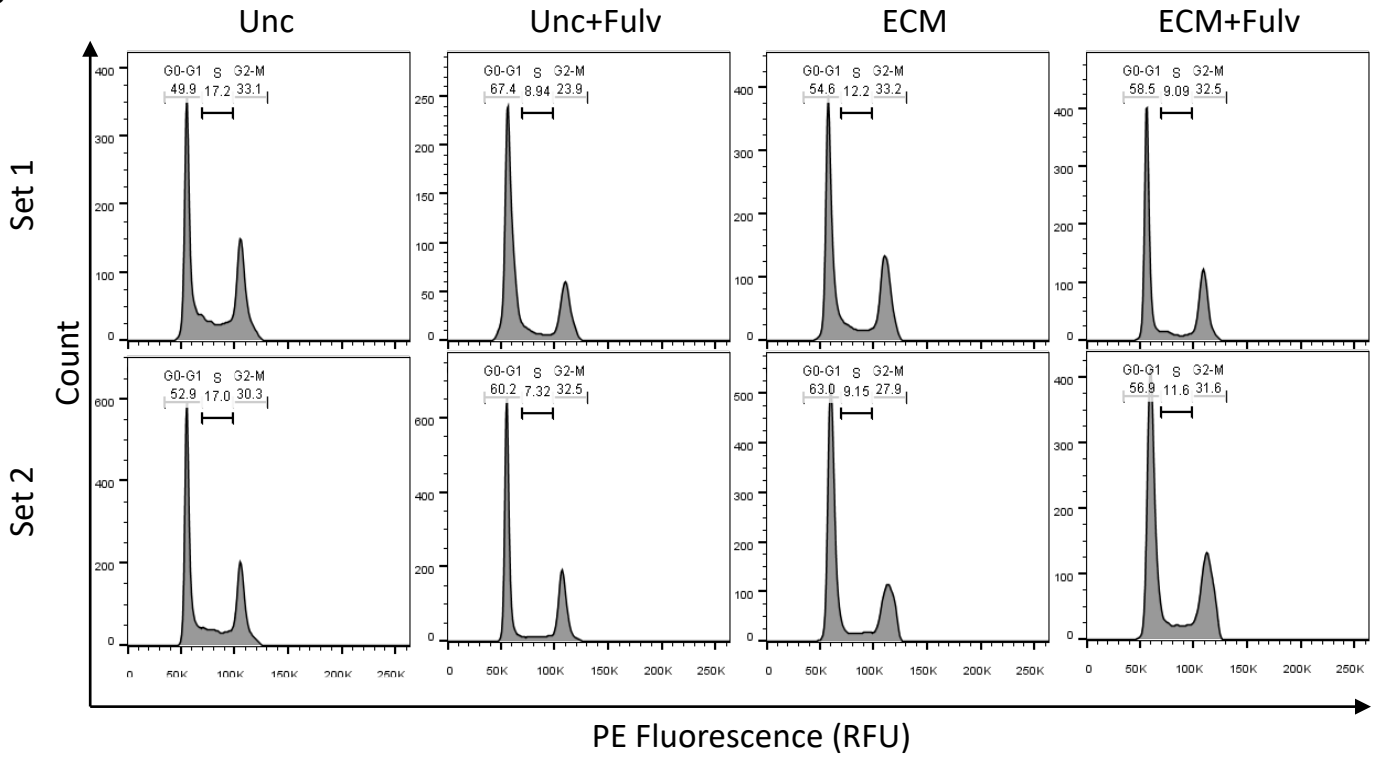

Supplement: NIHMS1636673-supplement-1.pdf [file NIHMS1636673-supplement-1.pdf]
